# Supplementary material for: Changes in the Orexin System in Rats Exhibiting Learned Helplessness Behaviors
Source: MDPI journal article supplement (doi:10.3390/brainsci11121634), 2021-12-10
Supplement: s1 [file s1]

Supplemental material

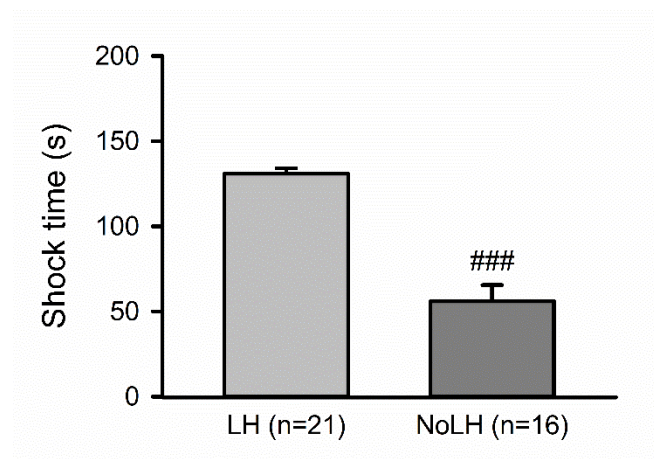

**Figure S1.** Shock time of the second AT. On average, the LH rats was shocked  $130.9 \pm 3.2$  s whereas No-LH rat was shocked  $56 \pm 9.5$  s. At the first AT, there were 22 LH rats and 15 No-LH rats. At the second AT, one of the LH rats from the first AT became No-LH rats. All the No-LH rats from the first AT test remained to be No-LH rats at the second AT.

(A)

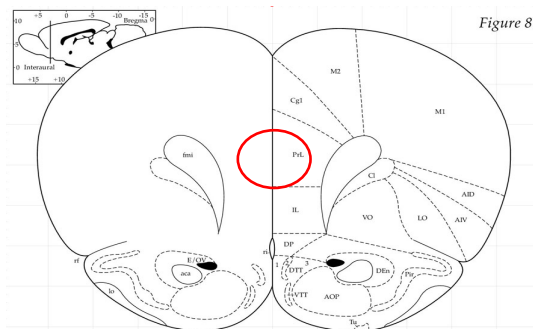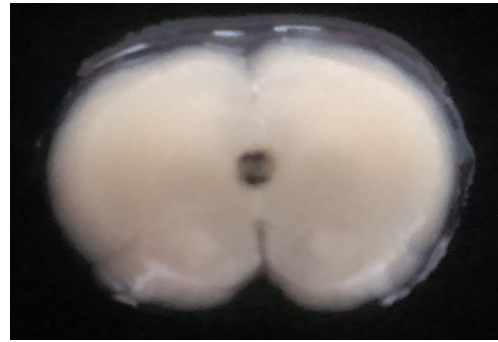

(B)

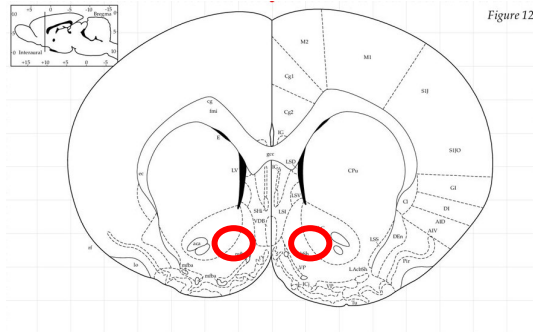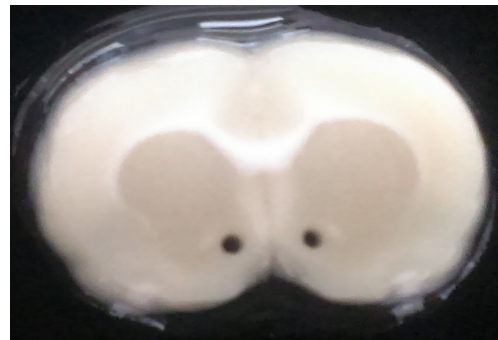

(C)

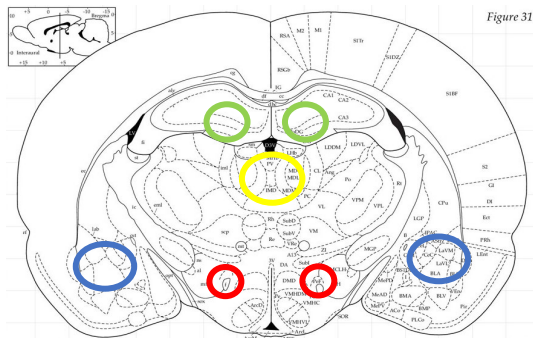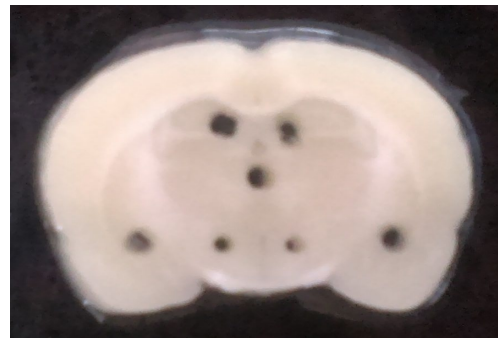

(D)

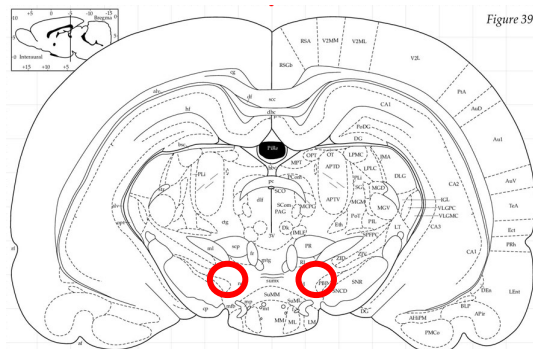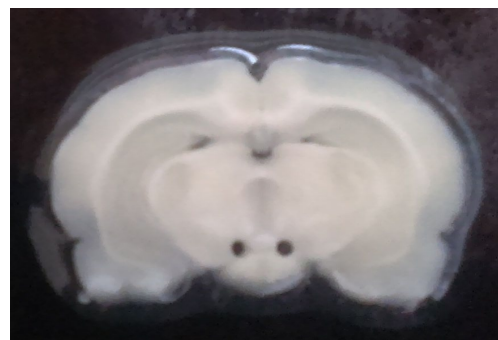

**Figure S2.** Brain tissue sampling location

(A) Prelimbic medial prefrontal cortex prelimbic area (B) Nucleus accumbens, including parts of core and shell area (C) Dentate gyrus of hippocampus (green); Paraventricular nucleus of thalamus (yellow); Amygdala (blue); Hypothalamus (red) (D) Ventral tegmental area
